# Supplementary material for: Bathymetry and latitude modify lake warming under ice
Source: Copernicus journal article supplement (doi:10.5194/hess-25-1813-2021), 2021-04-07
Supplement: Supplementary file 1 [file hess-25-1813-2021-supplement.zip]

Archive with 3 entries (3 files):
- Movie_S1.avi
- hess-25-1813-2021-supplement-title-page.pdf
- Ramonetal_SI_HESS.pdf
