# Supplementary material for: Bathymetry and latitude modify lake warming under ice
Source: Copernicus journal article supplement (doi:10.5194/hess-25-1813-2021), 2021-04-07
Supplement: Supplementary file 1 [file hess-25-1813-2021-supplement.zip › hess-25-1813-2021-supplement-title-page.pdf]

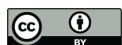

## *Supplement of*

# **Bathymetry and latitude modify lake warming under ice**

**Cintia L. Ramón et al.**

*Correspondence to:* Cintia L. Ramón ([cintia.ramoncasanas@eawag.ch](mailto:cintia.ramoncasanas@eawag.ch))

- [hess-25-1813-2021-supplement-title-page.pdf](#)
- [Movie\\_S1.avi](#)
- [Ramonetal\\_SI\\_HESS.pdf](#)

The copyright of individual parts of the supplement might differ from the article licence.
